# Supplementary material
Source: PubMed Central journal article supplement (PMC7047597)
Supplement: NIHMS1546026-supplement-1.pdf [file NIHMS1546026-supplement-1.pdf]

**Supplementary Table 1. Metabolite purity and concentrations used in the single-dose screen.**

Purity was determined by running the metabolites in LC-MS in positive and negative ion modes. Concentrations used in the single-dose screen were chosen with regard to metabolite solubility in DMSO (most metabolites were soluble at 100 mM) in order to reach a final DMSO concentration in each well that did not exceed 0.25%. N/d — not detectable by the methods used for our quality control.

| <b>Metabolite</b>      | <b>Purity (%)</b> | <b>Concentration (<math>\mu</math>M)</b> |
|------------------------|-------------------|------------------------------------------|
| linoleoyl ethanolamide | 99                | 250                                      |
| D-sphingosine          | 96.3              | 140                                      |
| phytosphingosine       | 99.4              | 250                                      |
| N,N-dimethylarginine   | 99.3              | 250                                      |
| creatine               | 97.2              | 125                                      |
| N-acetylputrescine     | 91.7              | 250                                      |
| C16:0 LPC              | 95.9              | 50                                       |
| L-lactic acid          | n/d               | 250                                      |
| taurine                | 86.7              | 250                                      |
| L-carnitine            | 99.9              | 125                                      |
| C18:1 CE               | n/d               | 50                                       |
| eicosatrienoic acid    | 11.66             | 250                                      |
| eicosapentaenoic acid  | 13.49             | 250                                      |
| arachidonic acid       | 28.67             | 250                                      |
| docosahexaenoic acid   | 79.36             | 250                                      |
| deoxycarnitine         | 96.9              | 250                                      |
| N-acetyl-L-arginine    | 85.3              | 250                                      |
| azelaic acid           | 99.6              | 250                                      |
| sebacic acid           | 98.3              | 250                                      |
| suberic acid           | 99                | 250                                      |
| hexanoic acid          | n/d               | 250                                      |
| caprylic acid          | 38.18             | 250                                      |
| dodecanedioic acid     | 98.7              | 250                                      |
| pyrocatechol           | 98.31             | 250                                      |
| 4-methylcatechol       | 98.16             | 250                                      |
| linoleic acid          | 99.6              | 250                                      |
| alpha-linolenic acid   | 87.21             | 250                                      |
| hydrocinnamic acid     | 98.36             | 250                                      |
| pantothenic acid       | 84.4              | 250                                      |
| adenine                | 93.9              | 250                                      |

|                          |       |      |
|--------------------------|-------|------|
| nicotinic acid           | 97.4  | 250  |
| pyridoxamine             | 98.9  | 250  |
| putrescine               | 98.2  | 250  |
| histamine                | 98.8  | 250  |
| cadaverine               | n/d   | 250  |
| 4-guanidinobutanoic acid | 47.9  | 125  |
| L-fucose                 | n/d   | 250  |
| glyceric acid            | 98.5  | 250  |
| oleamide                 | 99.2  | 250  |
| C18:1 LPC                | 98.9  | 62.5 |
| L-tryptophan             | 94.05 | 250  |
| 2-palmitoylglycerol      | 96.7  | 250  |
| butyric acid             | n/d   | 250  |
| isovaleric acid          | n/d   | 250  |
| trimethylbenzene         | n/d   | 250  |
| phenylacetic acid        | n/d   | 250  |
| propionic acid           | n/d   | 250  |
| cyclohexylamine          | n/d   | 250  |
| ascorbic acid            | n/d   | 190  |
| urocanic acid            | 90    | 250  |
| <b>DMSO control</b>      | n/d   | 14   |

**Supplementary Table 2. Bacterial isolates used in this study.** The identity of the individual isolates was determined by PCR amplification and subsequent sequencing of the *rrs* gene (16S ribosomal RNA) using primers 27F and 1492R<sup>1</sup>. All isolates are from PRISM subjects except for strain RJX1118, which was isolated from an infant enrolled in the DIABIMMUNE cohort, a risk assessment study for the development of type 1 diabetes<sup>2</sup>.

CD — Crohn’s disease patient, UC — ulcerative colitis patient, n/a — not available

| Isolate ID | Sample source | IBD Condition    | Sanger 16S ID                   | Abundance in IBD (PRISM) |
|------------|---------------|------------------|---------------------------------|--------------------------|
| RJX1262    | stool         | CD- L1 Ileum     | <i>Lactobacillus gasseri</i>    | Enriched                 |
| RJX1083    | stool         | CD               | <i>Escherichia coli</i>         | Enriched                 |
| RJX1118    | stool         | n/a              | <i>Ruminococcus gnavus</i>      | Enriched                 |
| RJX1084    | stool         | non-IBD          | <i>Alistipes shahii</i>         | Depleted                 |
| RJX1085    | stool         | non-IBD          | <i>Ruminococcus lactaris</i>    | Depleted                 |
| RJX1086    | stool         | UC               | <i>Streptococcus salivarius</i> | Depleted                 |
| RJX1251    | stool         | CD- L3 Ileocolon | <i>Enterococcus faecalis</i>    | Unchanged                |

**Supplementary Table 3. Metabolic functions significantly changing in response to NAE addition.**

| <b>Class</b>                               | <b>KEGG module</b>                                     |
|--------------------------------------------|--------------------------------------------------------|
| Energy metabolism                          | M00144, M00150, M00157, M00169, M00417                 |
| Amino acid metabolism                      | M00019, M00020, M00021, M00027, M00570                 |
| Metabolism of cofactors and vitamins       | M00115, M00117, M00123, M00125, M00126, M00127, M00140 |
| Carbohydrate metabolism                    | M00003, M00005, M00006, M00010, M00549                 |
| Glycan metabolism                          | M00063, M00064                                         |
| Lipid metabolism                           | M00086, M00093                                         |
| Biosynthesis of terpenoids and polyketides | M00096                                                 |

## Supplementary Information References

- 1 Lane, D. J. *16S/23S rRNA sequencing*. 115-175 (John Wiley and Sons, 1991).
- 2 Vatanen, T. *et al.* Variation in Microbiome LPS Immunogenicity Contributes to Autoimmunity in Humans. *Cell* **165**, 1551, doi:10.1016/j.cell.2016.05.056 (2016).
